# Supplementary material for: Analytical Modeling and Empirical Analysis of Binary Options Strategies
Source: MDPI journal article supplement (doi:10.3390/fi14070208), 2022-07-06
Supplement: s1 [file s1]

## Supplement for

### **“Analytical Modeling and Empirical Analysis of Binary Options Strategies”**

#### **File 1. Research Motivation**

Binary options have been and will be attracting many retail investors, given their simplicity and appeal. Yet, the research literature has multiple gaps of knowledge on binary options, resulting in uncertainty and caution by investors and policymakers. To fill some of these gaps, which are listed subsequently, the presented research study develops a mathematical model that enables the performance evaluation of investment strategies. The research literature focused mostly on trading strategies for binary options, with a focus on the varying actions to take in each trade. In other words, the bulk of the research on binary options focused on trading and pricing, each trade decision for which requires extensive computations. Such trading and pricing strategies are not intuitive or practical for the average investor. In contrast, this work is the first of its kind and researches intuitive investment strategies rather than the trading strategies that can be easily understood and applied. The strategies introduced and analyzed in this paper focus on simple, intuitive decision rules on how to invest in and out of a series of trades over a period.

The results and insights obtained in this research study can serve as guidance for stakeholders in the finance sector, including risk-seeking investors, exchanges, trading software, expert advisor developers, and policymakers at regulatory bodies.

## File 2. Operational Mechanisms

Trading platforms treat binary options as nontradeable cash-settled futures contracts [1], which take time and require that the option decompose slowly. The patent by Gogol, Glinberg, and Michaels [1] introduces a clearing system that helps clear the binary option within the clearing firm's bookkeeping system. [2] proposes a new system that engenders a binary options index from a subset of bids and offers based on certain rules. The patent by Genzer and Avraham [3] describes a binary options trading system that can be used through the web without the need for a download. The patent presents a solution to resolve conflicts of interest between parties in the current binary options trading process. The patent by Montanaro et al. [4] describes systems and methods that enable trades to be exchanged in a structured market in a standardized format. The patent also provides methods to determine the closing settlement value of binary options-based securities in order to preserve a fair and orderly trading environment for such instruments.

1. Gogol, E.; Glinberg, D.; Michaels, D. Processing Binary Options in Future Exchange Clearing. US Patent No. 8,224,742. Washington, D.C.: U.S. Patent and Trademark Office, 2012
2. Jaycobs, R., Glantz, N. and Les Walker, J. Systems and Methods for Computing an Index for a Binary Options Transaction. U.S Patent No. 10 vol. 242,403. Washington, D.C.: U.S. Patent and Trademark Office, 2019
3. Genzer, Y.; Avraham, G. Binary Options Trading System. US Patent No. 2017/0076370. Washington, D.C.: U.S. Patent and Trademark Office, 2017
4. Montanaro, D. A.; Bickford, M. T.; Burns, J. P.; Masciale, C. P.; Ebner, S. R., Binary Options on an Organized Exchange and the Systems and Methods for Trading the Same. U.S Patent No. 8,738,499. Washington, D.C.: U.S. Patent and Trademark Office, 2014

### File 3. Trading Algorithms

[5] suggests a binary options algorithm that includes one weekly buy/sell order and that can result in 87% overall gains. [6] proposes a signal-processing algorithm for binary options that involves one weekly buy/sell order and that can achieve 82% overall gains. [7] presents a hybrid algorithm for trading binary options that incorporates thousands of classifiers for robustness. The results suggest that the algorithm enables a profitable and fast-trading method that can be used for binary options. [8] uses technical analysis to generate buy–sell signals for trading binary options that can generate profits. [9] proposes a short-term strategy for trading monthly U.S. Nonfarm Employment Reports combining binary options, temporal warning dynamics, and triggering trading functionalities (TTF). The study recommends that the best way to trade NFP release reports is to include TTF functionalities and binary options for short-term swing traders. [10] provides practical uses and evaluations of eight trading strategies by using a Bollinger bands indicator to analyze 6,912 time series values of the “EUR/USD” pair. Most of the trades are realized when a double deviation is used in conjunction with the Bollinger bands.

5. Giunta, G.; Benedetto, F. Empirical Case Study of Binary Options Trading: an Interdisciplinary Application of Telecommunications Methodology to Financial Economics. *International Journal of Interdisciplinary Telecommunications & Networking*, **2012**, 4 (4), 54–63. doi:10.4018/jitn.2012100104.
6. Benedetto, F.; Giunta, G. Communication Services Applied to Business: A Simple Algorithm for Personal Trading. 2013 IEEE 24th Annual International Symposium on Personal, Indoor, and Mobile Radio Communications (PIMRC).
7. Rosa, L. A Profitable Hybrid Strategy for Binary Options. 2016. <http://www.advancedsourcecode.com/binaryoptions.pdf>. (accessed March 26, 2021)
8. Brits, F. S. *Utilising Technical Analysis to Generate Buy-and-Sell Signals to Trade Binary Options*. Doctoral Thesis 2016, Potchefstroom, South Africa. South Africa: North-West University, Potchefstroom Campus.
9. Basdekidou, V. A. Nonfarm employment report trading with binary options & temporal functionalities. *Annales Universitatis Apulensis Series Oeconomica* **2017**, 19 (1): 15–24.
10. Kolková, A.; Lenertová, L. Binary Options as a Modern Phenomenon of Financial Business. *International Journal of Entrepreneurial Knowledge* **2016**, 4 (1): 52–9. doi:10.1515/ijek-2016-0004.

#### File 4. Options Pricing

[11] presents a semi-discretization scheme that uses the Itô formula and the no-arbitrage principle in the constant elasticity of variance (CEV) process. [12] suggests solving the Black–Scholes partial differential equation (PDE) with a payoff including discontinuities to evaluate binary options efficiently. The research proposes two methods: Type I, an adaptive time-stepping hybrid finite difference method, and Type II, a method that combines two uniform meshes. The results indicate that both methods are far more effective than hybrid methods with fixed time measures and that you get far more efficiency than you can see. [13] proposes a formula for pricing binary options using a CEV, with consideration of semi-discretization. Numerical experiments suggest that the algorithm is stable and convergent. [14–15] incorporates fuzzy set theory in pricing binary options to explain the uncertainty. [16] proposes a pricing method to solve the Black–Scholes PDEs with different binary-type coefficients.

11. Guojun, Y.; X. Qingxian. A New Numerical Method for Pricing Binary Options in the CEV Process. In International Conference on E-Business and E-Government (ICEE) **2011**, 1–4. IEEE Publications.
12. Kim, H.-J.; Moon, K.-S. Variable Time-Stepping Hybrid Finite Difference Methods for Pricing Binary Options. *Bulletin of the Korean Mathematical Society* **2011**, 48 (2), pp. 413–26. <https://doi.org/10.4134/BKMS.2011.48.2.413>
13. Guo-jun, Y. Study on the Pricing of Binary Options in the CEV Process Based on Semidiscretization. *Journal of Systems Engineering* **2012**, [https://en.cnki.com.cn/Article\\_en/CJFDTotal-XTGC201201005.htm](https://en.cnki.com.cn/Article_en/CJFDTotal-XTGC201201005.htm). (accessed 26 March 2021).
14. Thavaneswaran, A.; Appadoo, S. S.; Frank, J. Binary Option Pricing Using Fuzzy Numbers. *Applied Mathematics Letters* **2013**, 26 (1), 65–72. <https://doi.org/10.1016/j.aml.2012.03.034>.
15. Miyake, M.; Inoue, H.; Shi, J.; Shimokawa, T. A Binary Option Pricing Based on Fuzziness. *International Journal of Information Technology & Decision Making* **2014**, 13 (6), 1211–27. <https://doi.org/10.1142/S0219622014500345>.
16. Hyong-Chol, O.; Dong-Hyok, K.; Jong-Jun J.; Song-Hun, R. Integrals of Higher Binary Options and Defaultable Bonds with Discrete Default Information. *Electronic Journal of Mathematical Analysis & Applications* **2014**, 2, 190–214.

### File 5. Variations of Binary Options

Binary options have multiple variations that are studied in the following streams of research: [17] provides insights into valuing one-touch double-barrier binary options, along with knockout, knockin, European, and American options. The study applies the traditional Black–Scholes Model for valuation and discusses how investors can use directional trades or structured products in trading. [18] suggests a model for valuing American binary FX options, empirically testing the method with real-world data sets. [19] discusses how the expiry payoffs of the exotic options can be expressed as a combination of the payoffs of some higher-order binary options. [20] proposes a model for valuing American options using a portfolio of binary power options. The proposed model is easier to implement than the old one is. [21] investigates binary barrier options and provides a comparison of the American and European binary options barrier prices.

17. Hui, C. H. One-Touch Double Barrier Binary Option Values. *Applied Financial Economics* **1996**, 6 (4): 343–6. <https://doi.org/10.1080/096031096334141>.
18. Smith, K. *American binary FX options: From theoretical value to market price*. Doctoral Thesis 2010, Perth, Australia: University of Western Australia.
19. Hyong-Chol, O.; Kim, M.-C. Higher Order Binary Options and Multiple Expiry Exotics. *Electronic. Journal of Mathematical Analysis & Applications* **2013**, 1 (2), 247–59.
20. Chiang, M.-H.; Fu H.-H.; Huang Y.-T., Lo; C.-L.; Shih, P.-T. Analytical Approximations for American Options: the Binary Power Option Approach. *Journal of Financial Studies* **2018**, 26 (3): 91.
21. Gao, M.; Wei, Z. The Barrier Binary Options. *Journal of Mathematical Finance* **2020**, 10 (1): 140–56. doi:10.4236/jmf.2020.101010.

## File 6. Risks of binary options

Binary options have many interesting characteristics that while making them attractive for trading also come with the following risks and disadvantages:

- The most significant risk with binary options is the extent of fraud that trading platforms commit, which is typically more severe than the extent of fraud that other instruments involve. To this end, after an increase in investors' complaints related to binary options trading, both the U.S. Securities and Exchange Commission (US SEC) (<https://www.sec.gov>) and Commodity Futures Trading Commission (CFTC) (<https://www.cftc.gov>) warned investors about fraudulent websites for binary options trading [22]. The complaints included "refusal to credit customer accounts or reimburse funds to customers; identity theft; and manipulation of software to generate losing trades." The Financial Industry Regulatory Authority (FINRA) (<https://www.finra.org/about/>) also highlighted the significance of such fraudulent schemes [23].
- In what is related to the first category of risk, another concern is related to the legal aspects of binary options. Legal authorities in some countries have banned trading in, or advertising, binary options. Some countries banned either retail or all binary options because of increasing complaints about scams and frauds on binary options trading platforms, many of which are unregulated and operate from countries other than those where their customers reside. For example, in 2019, the Financial Conduct Authority (FCA) permanently banned the sale of binary options to retail investors in the UK but still allowed such transactions for institutional investors [24]. Similarly, the financial regulatory agency in Belgium (FSMA) banned the distribution of some over-the-counter instruments, such as binary options and contracts for difference (CFDs) [25]. In 2017, securities regulators in Canada banned short-term binary options [26]. In countries that have not declared binary options illegal, their advertisement might still be banned. Over time, the scope of the bans might change. For example, the Netherlands' Financial Markets Authority (AFM) banned the advertising of binary options in 2017 [27], which was followed by temporary prohibition of the marketing, distribution, or sale of binary options for retail clients in EU countries by the European Securities and Markets Authority (ESMA) [28]. Although ESMA's temporarily prohibiting of binary options was not further renewed in 2019, many national authorities in the EU, including Germany and The Netherlands, implemented permanent prohibitions on binary options [29-30].
- Binary options are difficult to value and predict because they might have short durations, ranging from hours to minutes or even seconds. Short durations make it difficult for traders to analyze the data and make predictions, given the high uncertainty and short timespan for proper logical reasoning and human-involved critical analysis. In this respect, the FCA considered binary options as "high risk" and "speculation" [31]. Although many tools can help investors predict the value of binary options, some practitioners assure that an investor needs to predict correctly at least 55% of the time just to be able to "break even". [32] provides a formula for the minimum required prediction accuracy as a function of the payout percentage.
- For an ethical and legally compliant trader, the high risk, negative perception, and legal treatment of binary options might be discouraging. Some countries even consider binary options to be gambling rather than a financial product. For example, until early 2018, binary options in the UK were regulated by the Gambling Commission and not the FCA (FCA 2020). A master's thesis that studied Maltese law stated that although binary options come under the European Union's investment regime, some types of binary options need to be classified as remote gambling regimes [33].
- Binary options' small contract size lends itself to small returns each time [34], requiring many trades to earn significant gains.
- The size of the market for binary options is not as large as that of the traditional options market [34]

22. SEC. 2016. Investor Alert: Binary Options and Fraud.. [https://www.sec.gov/investor/alerts/ia\\_binary.pdf](https://www.sec.gov/investor/alerts/ia_binary.pdf). (accessed March 26, 2021).
23. All-Too-Often Fraudulent. 2019. <https://www.finra.org/investors/alerts/binary-options> (accessed March 26, 2021).
24. FCA: Binary Options. 2020. <https://www.fca.org.uk/consumers/binary-options>. (accessed March 26, 2021).
25. FSMA: FSMA Regulation Governing the Distribution of Certain Derivative Financial Instruments (Binary Options, Cfds, Etc.). <https://www.fsma.be/en/faq/fsma-regulation-governing-distribution-certain-derivative-financial-instruments-binary-options-0> (accessed March 26, 2021).
26. O’Kane, J. 2017. Regulators Ban Short-Term Binary Options but Warn of Enforcement Challenges. <https://www.theglobeandmail.com/report-on-business/canadian-regulators-ban-short-term-binary-options-the-leading-type-of-investment-fraud/article36419085/> (accessed March 26, 2021).
27. AFM: Dutch Regulator Proposes Ban on Advertising of Binary Options. 2017. <https://financefeeds.com/dutch-regulator-proposes-ban-advertising-binary-options/> (accessed March 26, 2021)
28. ESMA: European Securities and Markets Authority Decision (EU) 2018/795 of 22 May 2018. [https://eur-lex.europa.eu/legal-content/EN/TXT/HTML/?uri=CELEX:32018X0601\(01\)&qid=1528704280041&from=en](https://eur-lex.europa.eu/legal-content/EN/TXT/HTML/?uri=CELEX:32018X0601(01)&qid=1528704280041&from=en) (accessed March 26, 2021).
29. ESMA: ESMA Ceases Renewal of Product Intervention Measure Relating to Binary Options. 2019. <https://www.esma.europa.eu/press-news/esma-news/esma-ceases-renewal-product-intervention-measure-relating-binary-options>.
30. AFM. AFM Takes National Measures to Prohibit Binary Options and to Restrict the Marketing or Sales of CFDs. April 17. <https://www.afm.nl/en/consumenten/nieuws/2019/apr/binaire-opties-cfds-interventies> (accessed March 26, 2021).
31. Fantato, D. 2017. FCA Warns Investors against Binary Options. <https://www.ftadviser.com/investments/2017/11/15/fca-warns-investors-against-binary-options/>.(accessed March 26, 2021).
32. Pape, G. 2010. Don't Gamble on Binary Options. <https://www.forbes.com/sites/investor/2010/07/27/dont-gamble-on-binary-options/>. (accessed March 26, 2021).
33. Micallef, R. 2016. The legal and regulatory aspects of online binary options under Maltese law. Master's Thesis. Malta: University of Malta.
34. Nekritin, A. 2012. Binary Options: Strategies for Directional and Volatility Trading. Wiley Trading Series. New Jersey: John Wiley & Sons.
- 35.

**File 7. Trend Lines Models for Strategy B**

Polynomial trend models of degree 3 were computed for roiB Median as a function of a given investment proportion ( $z'$ ) for a given prediction accuracy and payout percentage value pair ( $p, r$ ).

The model might be significant at  $p \leq 0.05$ .

The prediction accuracy ( $p$ ) factor might be significant at  $p \leq 0.05$ .

The payout percentage ( $r$ ) factor might be significant at  $p \leq 0.05$ .

|                                          |                                                                                                                               |
|------------------------------------------|-------------------------------------------------------------------------------------------------------------------------------|
| <b>Model formula:</b>                    | Prediction Accuracy*Payout Percentage*(Investment Proportion^3 + Investment Proportion^2 + Investment Proportion + Intercept) |
| <b>Number of modeled observations:</b>   | 15,824                                                                                                                        |
| <b>Number of filtered observations:</b>  | 0                                                                                                                             |
| <b>Model degrees of freedom:</b>         | 420                                                                                                                           |
| <b>Residual degrees of freedom (DF):</b> | 15,404                                                                                                                        |
| <b>SSE (sum squared error):</b>          | 130,162                                                                                                                       |
| <b>MSE (mean squared error):</b>         | 8.44991                                                                                                                       |
| <b>R-Squared:</b>                        | 0.968463                                                                                                                      |
| <b>Standard error:</b>                   | 2.90687                                                                                                                       |
| <b>p-value (significance):</b>           | < 0.0001                                                                                                                      |

**Analysis of Variance:**

| <u>Field</u>                 | <u>DF</u> | <u>SSE</u> | <u>MSE</u> | <u>F</u> | <u>p-value</u> |
|------------------------------|-----------|------------|------------|----------|----------------|
| <b>Prediction Accuracy p</b> | 380       | 1617501.3  | 4256.58    | 503.743  | < 0.0001       |
| <b>Payout Percentage r</b>   | 368       | 1967036.7  | 5345.21    | 632.576  | < 0.0001       |

## Individual Trend Lines:

| Panels   |          | Line           |     | Coefficients            |           |          |           |           |
|----------|----------|----------------|-----|-------------------------|-----------|----------|-----------|-----------|
| <i>p</i> | <i>r</i> | <i>p-value</i> | DF  | Term                    | Value     | StdErr   | t-value   | p-value   |
| 0.7      | 0.5      | < 0.0001       | 88  | Investment Proportion^3 | 45.972    | 6.86855  | 6.69311   | < 0.0001  |
|          |          |                |     | Investment Proportion^2 | -65.0124  | 9.24203  | -7.03442  | < 0.0001  |
|          |          |                |     | Investment Proportion   | 20.3122   | 3.36786  | 6.03121   | < 0.0001  |
|          |          |                |     | Intercept               | 1.0517    | 0.355849 | 2.95548   | 0.0040057 |
| 0.7      | 0.55     | < 0.0001       | 227 | Investment Proportion^3 | 57.6844   | 10.0275  | 5.75261   | < 0.0001  |
|          |          |                |     | Investment Proportion^2 | -115.818  | 14.0809  | -8.22513  | < 0.0001  |
|          |          |                |     | Investment Proportion   | 58.6158   | 5.79492  | 10.115    | < 0.0001  |
|          |          |                |     | Intercept               | -1.67513  | 0.684674 | -2.44661  | 0.0151808 |
| 0.7      | 0.6      | < 0.0001       | 228 | Investment Proportion^3 | -8.18444  | 14.586   | -0.561117 | 0.575269  |
|          |          |                |     | Investment Proportion^2 | -28.9255  | 23.0436  | -1.25525  | 0.210674  |
|          |          |                |     | Investment Proportion   | 42.422    | 10.7682  | 3.93957   | 0.0001085 |
|          |          |                |     | Intercept               | 0.0841255 | 1.40229  | 0.0599913 | 0.952215  |

|     |      |          |     |                         |          |          |           |           |
|-----|------|----------|-----|-------------------------|----------|----------|-----------|-----------|
| 0.7 | 0.65 | < 0.0001 | 202 | Investment Proportion^3 | -4.77201 | 13.0331  | -0.366144 | 0.714641  |
|     |      |          |     | Investment Proportion^2 | -18.3992 | 20.492   | -0.897871 | 0.370323  |
|     |      |          |     | Investment Proportion   | 45.9924  | 9.27522  | 4.95863   | < 0.0001  |
|     |      |          |     | Intercept               | 0.618433 | 1.08891  | 0.567938  | 0.570708  |
| 0.7 | 0.7  | < 0.0001 | 178 | Investment Proportion^3 | 4.22979  | 7.10296  | 0.595497  | 0.552267  |
|     |      |          |     | Investment Proportion^2 | -22.257  | 10.9008  | -2.04177  | 0.0426498 |
|     |      |          |     | Investment Proportion   | 56.2847  | 4.78192  | 11.7703   | < 0.0001  |
|     |      |          |     | Intercept               | 0.566522 | 0.56193  | 1.00817   | 0.31474   |
| 0.7 | 0.75 | < 0.0001 | 157 | Investment Proportion^3 | 2.62243  | 6.64911  | 0.394403  | 0.693818  |
|     |      |          |     | Investment Proportion^2 | -17.7313 | 10.3141  | -1.71913  | 0.0875616 |
|     |      |          |     | Investment Proportion   | 64.0121  | 4.55326  | 14.0585   | < 0.0001  |
|     |      |          |     | Intercept               | 0.621001 | 0.523393 | 1.18649   | 0.237221  |
| 0.7 | 0.8  | < 0.0001 | 136 | Investment Proportion^3 | -4.04486 | 6.16389  | -0.656219 | 0.512792  |
|     |      |          |     | Investment Proportion^2 | -6.29346 | 9.74702  | -0.64568  | 0.519575  |
|     |      |          |     | Investment Proportion   | 69.0621  | 4.39159  | 15.726    | < 0.0001  |
|     |      |          |     | Intercept               | 0.936211 | 0.50953  | 1.8374    | 0.0683332 |
| 0.7 | 0.85 | < 0.0001 | 139 | Investment Proportion^3 | -9.08477 | 6.03376  | -1.50566  | 0.134424  |
|     |      |          |     | Investment Proportion^2 | 1.53459  | 9.32731  | 0.164526  | 0.869556  |

|      |      |          |     |                         |           |          |           |           |
|------|------|----------|-----|-------------------------|-----------|----------|-----------|-----------|
|      |      |          |     | Investment Proportion   | 75.5595   | 4.07929  | 18.5227   | < 0.0001  |
|      |      |          |     | Intercept               | 1.14237   | 0.460473 | 2.48087   | 0.0142994 |
| 0.7  | 0.9  | < 0.0001 | 121 | Investment Proportion^3 | -8.0715   | 5.90787  | -1.36623  | 0.174401  |
|      |      |          |     | Investment Proportion^2 | 3.59049   | 9.09594  | 0.394735  | 0.693733  |
|      |      |          |     | Investment Proportion   | 83.0417   | 3.99688  | 20.7766   | < 0.0001  |
|      |      |          |     | Intercept               | 1.32859   | 0.466479 | 2.84812   | 0.0051693 |
| 0.7  | 0.95 | < 0.0001 | 127 | Investment Proportion^3 | -0.942929 | 5.92344  | -0.159186 | 0.873775  |
|      |      |          |     | Investment Proportion^2 | -4.22408  | 9.11971  | -0.463181 | 0.644027  |
|      |      |          |     | Investment Proportion   | 94.9609   | 4.05708  | 23.4062   | < 0.0001  |
|      |      |          |     | Intercept               | 1.09224   | 0.49451  | 2.20873   | 0.0289874 |
| 0.69 | 0.5  | < 0.0001 | 64  | Investment Proportion^3 | 13.0615   | 5.50639  | 2.37206   | 0.0207075 |
|      |      |          |     | Investment Proportion^2 | -13.5243  | 7.53358  | -1.7952   | 0.0773441 |
|      |      |          |     | Investment Proportion   | -0.603248 | 2.88678  | -0.208969 | 0.835136  |
|      |      |          |     | Intercept               | 2.12833   | 0.303857 | 7.0044    | < 0.0001  |
| 0.69 | 0.55 | < 0.0001 | 147 | Investment Proportion^3 | 73.0248   | 9.72585  | 7.50832   | < 0.0001  |
|      |      |          |     | Investment Proportion^2 | -116.539  | 13.4854  | -8.64188  | < 0.0001  |
|      |      |          |     | Investment Proportion   | 46.2288   | 5.14492  | 8.98533   | < 0.0001  |
|      |      |          |     | Intercept               | -0.581412 | 0.551755 | -1.05375  | 0.293726  |

|      |      |          |     |                         |           |          |           |           |
|------|------|----------|-----|-------------------------|-----------|----------|-----------|-----------|
| 0.69 | 0.6  | < 0.0001 | 231 | Investment Proportion^3 | 7.18047   | 12.3636  | 0.580776  | 0.561958  |
|      |      |          |     | Investment Proportion^2 | -55.7518  | 17.3443  | -3.21442  | 0.0014938 |
|      |      |          |     | Investment Proportion   | 45.0861   | 7.47031  | 6.03537   | < 0.0001  |
|      |      |          |     | Intercept               | -0.297027 | 0.963799 | -0.308183 | 0.758221  |
| 0.69 | 0.65 | < 0.0001 | 252 | Investment Proportion^3 | 23.4586   | 17.7935  | 1.31838   | 0.188572  |
|      |      |          |     | Investment Proportion^2 | -68.9451  | 28.0126  | -2.46122  | 0.0145175 |
|      |      |          |     | Investment Proportion   | 60.9087   | 12.6956  | 4.79762   | < 0.0001  |
|      |      |          |     | Intercept               | -0.885189 | 1.50395  | -0.588575 | 0.556674  |
| 0.69 | 0.7  | < 0.0001 | 189 | Investment Proportion^3 | -9.44928  | 10.0708  | -0.938282 | 0.349297  |
|      |      |          |     | Investment Proportion^2 | -10.2751  | 15.625   | -0.657605 | 0.511592  |
|      |      |          |     | Investment Proportion   | 48.0182   | 6.99274  | 6.86687   | < 0.0001  |
|      |      |          |     | Intercept               | 0.819232  | 0.844377 | 0.970221  | 0.333176  |
| 0.69 | 0.75 | < 0.0001 | 170 | Investment Proportion^3 | 2.77729   | 8.03248  | 0.345757  | 0.729953  |
|      |      |          |     | Investment Proportion^2 | -21.9106  | 12.7456  | -1.71908  | 0.0874205 |
|      |      |          |     | Investment Proportion   | 61.6667   | 5.84861  | 10.5438   | < 0.0001  |
|      |      |          |     | Intercept               | 0.397935  | 0.715604 | 0.556083  | 0.578885  |
| 0.69 | 0.8  | < 0.0001 | 144 | Investment Proportion^3 | -10.0831  | 7.415    | -1.35982  | 0.176011  |
|      |      |          |     | Investment Proportion^2 | 1.95049   | 11.9697  | 0.162953  | 0.870784  |

|      |      |          |     |                         |          |          |           |           |
|------|------|----------|-----|-------------------------|----------|----------|-----------|-----------|
|      |      |          |     | Investment Proportion   | 60.6044  | 5.5832   | 10.8548   | < 0.0001  |
|      |      |          |     | Intercept               | 1.28234  | 0.69984  | 1.83233   | 0.0689681 |
| 0.69 | 0.85 | < 0.0001 | 145 | Investment Proportion^3 | -11.3291 | 6.25076  | -1.81243  | 0.0719885 |
|      |      |          |     | Investment Proportion^2 | 5.10998  | 9.70905  | 0.526311  | 0.599476  |
|      |      |          |     | Investment Proportion   | 68.6106  | 4.29331  | 15.9808   | < 0.0001  |
|      |      |          |     | Intercept               | 1.33133  | 0.49938  | 2.66598   | 0.0085478 |
| 0.69 | 0.9  | < 0.0001 | 122 | Investment Proportion^3 | -13.6096 | 6.85843  | -1.98437  | 0.0494595 |
|      |      |          |     | Investment Proportion^2 | 8.38218  | 10.6844  | 0.784526  | 0.434252  |
|      |      |          |     | Investment Proportion   | 76.8759  | 4.7603   | 16.1494   | < 0.0001  |
|      |      |          |     | Intercept               | 1.38185  | 0.568389 | 2.43117   | 0.0165039 |
| 0.69 | 0.95 | < 0.0001 | 133 | Investment Proportion^3 | -3.12567 | 5.94098  | -0.526119 | 0.599682  |
|      |      |          |     | Investment Proportion^2 | -3.13883 | 8.95757  | -0.350411 | 0.726584  |
|      |      |          |     | Investment Proportion   | 89.7057  | 3.91306  | 22.9247   | < 0.0001  |
|      |      |          |     | Intercept               | 1.07314  | 0.470014 | 2.2832    | 0.0240044 |
| 0.68 | 0.5  | < 0.0001 | 69  | Investment Proportion^3 | -3.19139 | 3.55195  | -0.898488 | 0.37205   |
|      |      |          |     | Investment Proportion^2 | 9.2314   | 4.84053  | 1.9071    | 0.0606709 |
|      |      |          |     | Investment Proportion   | -7.80847 | 1.86634  | -4.18384  | < 0.0001  |
|      |      |          |     | Intercept               | 1.93079  | 0.194354 | 9.93443   | < 0.0001  |

|      |      |          |     |                         |          |          |            |           |
|------|------|----------|-----|-------------------------|----------|----------|------------|-----------|
| 0.68 | 0.55 | < 0.0001 | 91  | Investment Proportion^3 | 48.5758  | 7.07025  | 6.87045    | < 0.0001  |
|      |      |          |     | Investment Proportion^2 | -67.8152 | 9.46207  | -7.16705   | < 0.0001  |
|      |      |          |     | Investment Proportion   | 20.6536  | 3.44076  | 6.00264    | < 0.0001  |
|      |      |          |     | Intercept               | 1.16816  | 0.369092 | 3.16495    | 0.0021099 |
| 0.68 | 0.6  | < 0.0001 | 170 | Investment Proportion^3 | 63.8887  | 11.5135  | 5.54901    | < 0.0001  |
|      |      |          |     | Investment Proportion^2 | -120.936 | 16.5377  | -7.31278   | < 0.0001  |
|      |      |          |     | Investment Proportion   | 58.0826  | 6.98803  | 8.31173    | < 0.0001  |
|      |      |          |     | Intercept               | -1.42738 | 0.865101 | -1.64996   | 0.100798  |
| 0.68 | 0.65 | < 0.0001 | 202 | Investment Proportion^3 | -1.2048  | 16.3259  | -0.0737971 | 0.941245  |
|      |      |          |     | Investment Proportion^2 | -42.0342 | 23.7567  | -1.76936   | 0.0783426 |
|      |      |          |     | Investment Proportion   | 44.8998  | 10.0813  | 4.45375    | < 0.0001  |
|      |      |          |     | Intercept               | 0.164132 | 1.15425  | 0.142198   | 0.887065  |
| 0.68 | 0.7  | < 0.0001 | 244 | Investment Proportion^3 | -16.953  | 17.6935  | -0.958148  | 0.338936  |
|      |      |          |     | Investment Proportion^2 | -16.3238 | 27.9149  | -0.584769  | 0.559244  |
|      |      |          |     | Investment Proportion   | 48.1298  | 12.6904  | 3.79262    | 0.000188  |
|      |      |          |     | Intercept               | 0.346087 | 1.50595  | 0.229813   | 0.818429  |
| 0.68 | 0.75 | < 0.0001 | 177 | Investment Proportion^3 | 12.0253  | 9.92989  | 1.21102    | 0.227503  |
|      |      |          |     | Investment Proportion^2 | -40.868  | 15.8517  | -2.57815   | 0.0107466 |

|      |      |          |     |                         |            |          |            |           |
|------|------|----------|-----|-------------------------|------------|----------|------------|-----------|
|      |      |          |     | Investment Proportion   | 64.0666    | 7.28023  | 8.80008    | < 0.0001  |
|      |      |          |     | Intercept               | -0.183123  | 0.881764 | -0.207678  | 0.835719  |
| 0.68 | 0.8  | < 0.0001 | 165 | Investment Proportion^3 | -2.20833   | 7.6292   | -0.289458  | 0.772594  |
|      |      |          |     | Investment Proportion^2 | -14.5303   | 12.038   | -1.20704   | 0.229145  |
|      |      |          |     | Investment Proportion   | 62.5236    | 5.43726  | 11.4991    | < 0.0001  |
|      |      |          |     | Intercept               | 0.749948   | 0.640612 | 1.17067    | 0.243417  |
| 0.68 | 0.85 | < 0.0001 | 161 | Investment Proportion^3 | -8.46063   | 6.23603  | -1.35673   | 0.176765  |
|      |      |          |     | Investment Proportion^2 | -1.91733   | 9.78357  | -0.195975  | 0.844877  |
|      |      |          |     | Investment Proportion   | 66.6022    | 4.41128  | 15.0981    | < 0.0001  |
|      |      |          |     | intercept               | 1.14734    | 0.538588 | 2.13028    | 0.0346674 |
| 0.68 | 0.9  | < 0.0001 | 131 | Investment Proportion^3 | -15.777    | 7.04787  | -2.23855   | 0.026873  |
|      |      |          |     | Investment Proportion^2 | 9.64555    | 11.0157  | 0.875618   | 0.38284   |
|      |      |          |     | Investment Proportion   | 71.2262    | 4.99233  | 14.2671    | < 0.0001  |
|      |      |          |     | Intercept               | 1.54769    | 0.634035 | 2.44101    | 0.0159817 |
| 0.68 | 0.95 | < 0.0001 | 135 | Investment Proportion^3 | -5.27931   | 6.832    | -0.772732  | 0.441032  |
|      |      |          |     | Investment Proportion^2 | -0.0650612 | 10.4123  | -0.0062485 | 0.995024  |
|      |      |          |     | Investment Proportion   | 82.4907    | 4.51578  | 18.2672    | < 0.0001  |
|      |      |          |     | Intercept               | 1.31189    | 0.513972 | 2.55245    | 0.0118094 |

|      |      |          |     |                         |           |          |           |           |
|------|------|----------|-----|-------------------------|-----------|----------|-----------|-----------|
| 0.67 | 0.5  | < 0.0001 | 62  | Investment Proportion^3 | -10.6158  | 2.16197  | -4.91023  | < 0.0001  |
|      |      |          |     | Investment Proportion^2 | 19.0753   | 3.05256  | 6.24896   | < 0.0001  |
|      |      |          |     | Investment Proportion   | -10.4102  | 1.20377  | -8.648    | < 0.0001  |
|      |      |          |     | Intercept               | 1.65141   | 0.110377 | 14.9615   | < 0.0001  |
| 0.67 | 0.55 | < 0.0001 | 69  | Investment Proportion^3 | 17.58     | 4.97169  | 3.53603   | 0.0007307 |
|      |      |          |     | Investment Proportion^2 | -21.2667  | 6.64985  | -3.19808  | 0.0020896 |
|      |      |          |     | Investment Proportion   | 3.03831   | 2.47361  | 1.22829   | 0.223511  |
|      |      |          |     | Intercept               | 1.81306   | 0.262449 | 6.90826   | < 0.0001  |
| 0.67 | 0.6  | < 0.0001 | 135 | Investment Proportion^3 | 82.4039   | 9.59956  | 8.58413   | < 0.0001  |
|      |      |          |     | Investment Proportion^2 | -125.084  | 13.3754  | -9.35177  | < 0.0001  |
|      |      |          |     | Investment Proportion   | 46.3408   | 5.22635  | 8.86675   | < 0.0001  |
|      |      |          |     | Intercept               | -0.341288 | 0.606194 | -0.563002 | 0.574367  |
| 0.67 | 0.65 | < 0.0001 | 221 | Investment Proportion^3 | 31.4444   | 11.3595  | 2.76811   | 0.0061166 |
|      |      |          |     | Investment Proportion^2 | -87.1362  | 15.605   | -5.58386  | < 0.0001  |
|      |      |          |     | Investment Proportion   | 53.2717   | 6.32084  | 8.42794   | < 0.0001  |
|      |      |          |     | Intercept               | -0.626029 | 0.730532 | -0.85695  | 0.392401  |
| 0.67 | 0.7  | < 0.0001 | 228 | Investment Proportion^3 | 13.6767   | 16.4089  | 0.833495  | 0.405438  |
|      |      |          |     | Investment Proportion^2 | -59.1139  | 25.11    | -2.35419  | 0.0194126 |

|      |      |          |     |                         |           |          |           |           |
|------|------|----------|-----|-------------------------|-----------|----------|-----------|-----------|
|      |      |          |     | Investment Proportion   | 56.0331   | 11.2315  | 4.98894   | < 0.0001  |
|      |      |          |     | Intercept               | -0.45164  | 1.34544  | -0.335683 | 0.737418  |
| 0.67 | 0.75 | < 0.0001 | 221 | Investment Proportion^3 | 10.3124   | 20.6746  | 0.498796  | 0.618419  |
|      |      |          |     | Investment Proportion^2 | -53.2181  | 32.8482  | -1.62012  | 0.106632  |
|      |      |          |     | Investment Proportion   | 66.2588   | 15.0211  | 4.41104   | < 0.0001  |
|      |      |          |     | Intercept               | -0.848874 | 1.8042   | -0.470498 | 0.638463  |
| 0.67 | 0.8  | < 0.0001 | 182 | Investment Proportion^3 | -8.92243  | 13.0394  | -0.684268 | 0.494676  |
|      |      |          |     | Investment Proportion^2 | -12.1753  | 20.8393  | -0.584246 | 0.559778  |
|      |      |          |     | Investment Proportion   | 58.0567   | 9.62639  | 6.031     | < 0.0001  |
|      |      |          |     | Intercept               | 0.668545  | 1.20691  | 0.553933  | 0.580305  |
| 0.67 | 0.85 | < 0.0001 | 163 | Investment Proportion^3 | -15.7652  | 8.80829  | -1.78981  | 0.0753403 |
|      |      |          |     | Investment Proportion^2 | 6.3222    | 14.0272  | 0.450711  | 0.652797  |
|      |      |          |     | Investment Proportion   | 58.0351   | 6.38227  | 9.09317   | < 0.0001  |
|      |      |          |     | Intercept               | 1.41901   | 0.759534 | 1.86826   | 0.0635203 |
| 0.67 | 0.9  | < 0.0001 | 140 | Investment Proportion^3 | -18.6408  | 8.21013  | -2.27046  | 0.0247064 |
|      |      |          |     | Investment Proportion^2 | 13.2158   | 13.0535  | 1.01243   | 0.313078  |
|      |      |          |     | Investment Proportion   | 63.8481   | 5.95831  | 10.7158   | < 0.0001  |
|      |      |          |     | Intercept               | 1.74685   | 0.738377 | 2.36579   | 0.0193623 |

|      |      |          |     |                         |          |          |          |           |
|------|------|----------|-----|-------------------------|----------|----------|----------|-----------|
| 0.67 | 0.95 | < 0.0001 | 123 | Investment Proportion^3 | 2.26516  | 6.98128  | 0.324462 | 0.74614   |
|      |      |          |     | Investment Proportion^2 | -10.7826 | 10.6936  | -1.00832 | 0.315281  |
|      |      |          |     | Investment Proportion   | 80.815   | 4.66113  | 17.3381  | < 0.0001  |
|      |      |          |     | Intercept               | 1.04906  | 0.531495 | 1.9738   | 0.0506465 |
| 0.66 | 0.55 | < 0.0001 | 62  | Investment Proportion^3 | -5.98601 | 3.67421  | -1.6292  | 0.108342  |
|      |      |          |     | Investment Proportion^2 | 13.6881  | 5.10004  | 2.68391  | 0.0093196 |
|      |      |          |     | Investment Proportion   | -9.82883 | 2.01585  | -4.87578 | < 0.0001  |
|      |      |          |     | Intercept               | 2.16269  | 0.214198 | 10.0967  | < 0.0001  |
| 0.66 | 0.6  | < 0.0001 | 90  | Investment Proportion^3 | 41.8106  | 7.56042  | 5.53019  | < 0.0001  |
|      |      |          |     | Investment Proportion^2 | -56.6587 | 10.2037  | -5.55276 | < 0.0001  |
|      |      |          |     | Investment Proportion   | 15.6033  | 3.80003  | 4.1061   | < 0.0001  |
|      |      |          |     | Intercept               | 1.61482  | 0.428895 | 3.76506  | 0.0002965 |
| 0.66 | 0.65 | < 0.0001 | 165 | Investment Proportion^3 | 83.2448  | 8.80449  | 9.45481  | < 0.0001  |
|      |      |          |     | Investment Proportion^2 | -141.194 | 12.0184  | -11.7482 | < 0.0001  |
|      |      |          |     | Investment Proportion   | 60.296   | 4.55233  | 13.2451  | < 0.0001  |
|      |      |          |     | Intercept               | -1.14145 | 0.48766  | -2.34066 | 0.0204457 |
| 0.66 | 0.7  | < 0.0001 | 196 | Investment Proportion^3 | 3.0475   | 17.2194  | 0.176981 | 0.859706  |
|      |      |          |     | Investment Proportion^2 | -50.7727 | 23.5644  | -2.15463 | 0.0324106 |

|      |      |          |     |                         |          |          |           |           |
|------|------|----------|-----|-------------------------|----------|----------|-----------|-----------|
|      |      |          |     | Investment Proportion   | 45.4056  | 9.57435  | 4.74242   | < 0.0001  |
|      |      |          |     | Intercept               | 0.288753 | 1.09041  | 0.264811  | 0.791433  |
| 0.66 | 0.75 | < 0.0001 | 235 | Investment Proportion^3 | -5.41601 | 17.7172  | -0.305692 | 0.76011   |
|      |      |          |     | Investment Proportion^2 | -38.4076 | 27.7175  | -1.38568  | 0.167158  |
|      |      |          |     | Investment Proportion   | 55.714   | 12.5368  | 4.44405   | < 0.0001  |
|      |      |          |     | Intercept               | -0.32983 | 1.49382  | -0.220796 | 0.825443  |
| 0.66 | 0.8  | < 0.0001 | 203 | Investment Proportion^3 | -11.9829 | 24.7888  | -0.483401 | 0.629332  |
|      |      |          |     | Investment Proportion^2 | -19.6115 | 40.1663  | -0.488257 | 0.625895  |
|      |      |          |     | Investment Proportion   | 57.2849  | 18.8168  | 3.04436   | 0.0026405 |
|      |      |          |     | Intercept               | 0.203814 | 2.33752  | 0.0871926 | 0.930604  |
| 0.66 | 0.85 | < 0.0001 | 197 | Investment Proportion^3 | -21.9609 | 10.5093  | -2.08966  | 0.037932  |
|      |      |          |     | Investment Proportion^2 | 8.5501   | 16.8086  | 0.508674  | 0.61155   |
|      |      |          |     | Investment Proportion   | 52.996   | 7.6718   | 6.9079    | < 0.0001  |
|      |      |          |     | Intercept               | 1.45474  | 0.901259 | 1.61412   | 0.108102  |
| 0.66 | 0.9  | < 0.0001 | 166 | Investment Proportion^3 | -37.0105 | 9.3373   | -3.96373  | 0.0001094 |
|      |      |          |     | Investment Proportion^2 | 35.4629  | 15.0859  | 2.35073   | 0.0199117 |
|      |      |          |     | Investment Proportion   | 51.0208  | 7.06135  | 7.22535   | < 0.0001  |
|      |      |          |     | Intercept               | 2.3796   | 0.901286 | 2.64022   | 0.0090754 |

|      |      |          |     |                         |           |          |           |           |
|------|------|----------|-----|-------------------------|-----------|----------|-----------|-----------|
| 0.66 | 0.95 | < 0.0001 | 138 | Investment Proportion^3 | -0.846555 | 7.13545  | -0.118641 | 0.905733  |
|      |      |          |     | Investment Proportion^2 | -8.28537  | 11.0172  | -0.752039 | 0.453308  |
|      |      |          |     | Investment Proportion   | 74.4553   | 4.83235  | 15.4077   | < 0.0001  |
|      |      |          |     | Intercept               | 1.17889   | 0.551973 | 2.13579   | 0.0344623 |
| 0.65 | 0.55 | < 0.0001 | 45  | Investment Proportion^3 | -11.0942  | 2.32526  | -4.77114  | < 0.0001  |
|      |      |          |     | Investment Proportion^2 | 19.872    | 3.31836  | 5.98851   | < 0.0001  |
|      |      |          |     | Investment Proportion   | -10.7963  | 1.31251  | -8.22571  | < 0.0001  |
|      |      |          |     | Intercept               | 1.70097   | 0.117499 | 14.4765   | < 0.0001  |
| 0.65 | 0.6  | < 0.0001 | 57  | Investment Proportion^3 | 10.21     | 5.9772   | 1.70815   | 0.0930491 |
|      |      |          |     | Investment Proportion^2 | -8.80291  | 8.31619  | -1.05853  | 0.294281  |
|      |      |          |     | Investment Proportion   | -2.92498  | 3.30003  | -0.886349 | 0.379154  |
|      |      |          |     | Intercept               | 2.45975   | 0.368596 | 6.6733    | < 0.0001  |
| 0.65 | 0.65 | < 0.0001 | 146 | Investment Proportion^3 | 77.8822   | 8.88727  | 8.76334   | < 0.0001  |
|      |      |          |     | Investment Proportion^2 | -114.964  | 11.8321  | -9.71626  | < 0.0001  |
|      |      |          |     | Investment Proportion   | 40.4121   | 4.21526  | 9.58709   | < 0.0001  |
|      |      |          |     | Intercept               | 0.182298  | 0.436744 | 0.417403  | 0.676997  |
| 0.65 | 0.7  | < 0.0001 | 202 | Investment Proportion^3 | 72.7858   | 12.6073  | 5.7733    | < 0.0001  |
|      |      |          |     | Investment Proportion^2 | -140.106  | 17.393   | -8.05533  | < 0.0001  |

|      |      |          |     |                         |           |          |           |           |
|------|------|----------|-----|-------------------------|-----------|----------|-----------|-----------|
|      |      |          |     | Investment Proportion   | 68.0248   | 6.92212  | 9.82716   | < 0.0001  |
|      |      |          |     | Intercept               | -1.67569  | 0.786434 | -2.13075  | 0.0343193 |
| 0.65 | 0.75 | < 0.0001 | 196 | Investment Proportion^3 | 10.6924   | 17.7736  | 0.601591  | 0.548142  |
|      |      |          |     | Investment Proportion^2 | -63.6384  | 25.7698  | -2.4695   | 0.0143855 |
|      |      |          |     | Investment Proportion   | 56.5042   | 10.9684  | 5.15156   | < 0.0001  |
|      |      |          |     | Intercept               | -0.464999 | 1.24194  | -0.374414 | 0.708501  |
| 0.65 | 0.8  | < 0.0001 | 214 | Investment Proportion^3 | -40.069   | 19.2605  | -2.08037  | 0.038682  |
|      |      |          |     | Investment Proportion^2 | 11.3502   | 30.783   | 0.368717  | 0.712703  |
|      |      |          |     | Investment Proportion   | 41.2909   | 14.2147  | 2.90479   | 0.0040607 |
|      |      |          |     | Intercept               | 1.19096   | 1.70382  | 0.698994  | 0.485315  |
| 0.65 | 0.85 | < 0.0001 | 221 | Investment Proportion^3 | -62.2803  | 20.8535  | -2.98656  | 0.0031395 |
|      |      |          |     | Investment Proportion^2 | 55.2778   | 33.5622  | 1.64702   | 0.100974  |
|      |      |          |     | Investment Proportion   | 31.8013   | 15.5164  | 2.04953   | 0.0415916 |
|      |      |          |     | Intercept               | 2.74036   | 1.9009   | 1.44161   | 0.150828  |
| 0.65 | 0.9  | < 0.0001 | 168 | Investment Proportion^3 | -64.6998  | 18.8361  | -3.43488  | 0.0007469 |
|      |      |          |     | Investment Proportion^2 | 69.1119   | 30.0114  | 2.30285   | 0.0225131 |
|      |      |          |     | Investment Proportion   | 34.0686   | 13.7209  | 2.48297   | 0.0140109 |
|      |      |          |     | Intercept               | 3.2686    | 1.68949  | 1.93467   | 0.0547104 |

|      |      |          |     |                         |           |          |           |           |
|------|------|----------|-----|-------------------------|-----------|----------|-----------|-----------|
| 0.65 | 0.95 | < 0.0001 | 146 | Investment Proportion^3 | -3.85956  | 7.51227  | -0.513767 | 0.608191  |
|      |      |          |     | Investment Proportion^2 | -5.9293   | 11.7024  | -0.506675 | 0.613147  |
|      |      |          |     | Investment Proportion   | 68.021    | 5.25516  | 12.9437   | < 0.0001  |
|      |      |          |     | Intercept               | 1.31969   | 0.64679  | 2.04036   | 0.0431163 |
| 0.64 | 0.6  | < 0.0001 | 45  | Investment Proportion^3 | -6.28777  | 4.00521  | -1.5699   | 0.123445  |
|      |      |          |     | Investment Proportion^2 | 14.4994   | 5.79661  | 2.50136   | 0.0160777 |
|      |      |          |     | Investment Proportion   | -10.5136  | 2.39726  | -4.38565  | < 0.0001  |
|      |      |          |     | Intercept               | 2.34306   | 0.254382 | 9.2108    | < 0.0001  |
| 0.64 | 0.65 | < 0.0001 | 86  | Investment Proportion^3 | 37.1447   | 6.82106  | 5.44559   | < 0.0001  |
|      |      |          |     | Investment Proportion^2 | -48.7927  | 9.0657   | -5.38212  | < 0.0001  |
|      |      |          |     | Investment Proportion   | 12.1286   | 3.29064  | 3.68579   | 0.0003981 |
|      |      |          |     | Intercept               | 1.79689   | 0.351413 | 5.11332   | < 0.0001  |
| 0.64 | 0.7  | < 0.0001 | 138 | Investment Proportion^3 | 95.5033   | 11.7746  | 8.11097   | < 0.0001  |
|      |      |          |     | Investment Proportion^2 | -148.439  | 16.0583  | -9.24379  | < 0.0001  |
|      |      |          |     | Investment Proportion   | 56.9566   | 5.98283  | 9.52001   | < 0.0001  |
|      |      |          |     | Intercept               | -0.699418 | 0.637523 | -1.09709  | 0.274514  |
| 0.64 | 0.75 | < 0.0001 | 203 | Investment Proportion^3 | 43.1222   | 13.3163  | 3.2383    | 0.0014047 |
|      |      |          |     | Investment Proportion^2 | -104.334  | 18.4171  | -5.66509  | < 0.0001  |

|      |      |          |     |                         |            |          |            |           |
|------|------|----------|-----|-------------------------|------------|----------|------------|-----------|
|      |      |          |     | Investment Proportion   | 59.7071    | 7.56933  | 7.88803    | < 0.0001  |
|      |      |          |     | Intercept               | -0.686877  | 0.89876  | -0.764249  | 0.445606  |
| 0.64 | 0.8  | < 0.0001 | 194 | Investment Proportion^3 | -9.63684   | 26.1023  | -0.369194  | 0.712386  |
|      |      |          |     | Investment Proportion^2 | -40.0228   | 38.2638  | -1.04597   | 0.296877  |
|      |      |          |     | Investment Proportion   | 53.0557    | 16.6421  | 3.18803    | 0.0016701 |
|      |      |          |     | Intercept               | -0.0123615 | 1.97223  | -0.0062678 | 0.995006  |
| 0.64 | 0.85 | < 0.0001 | 201 | Investment Proportion^3 | -51.8336   | 22.8306  | -2.27036   | 0.0242465 |
|      |      |          |     | Investment Proportion^2 | 30.8559    | 36.0387  | 0.856188   | 0.392913  |
|      |      |          |     | Investment Proportion   | 37.2154    | 16.4807  | 2.25812    | 0.0250124 |
|      |      |          |     | Intercept               | 1.79331    | 2.04355  | 0.877549   | 0.381236  |
| 0.64 | 0.9  | < 0.0001 | 202 | Investment Proportion^3 | -62.8823   | 22.6166  | -2.78036   | 0.0059431 |
|      |      |          |     | Investment Proportion^2 | 60.5015    | 36.6499  | 1.65079    | 0.100334  |
|      |      |          |     | Investment Proportion   | 31.6301    | 17.1378  | 1.84564    | 0.0664087 |
|      |      |          |     | Intercept               | 3.2632     | 2.16881  | 1.5046     | 0.133989  |
| 0.64 | 0.95 | < 0.0001 | 166 | Investment Proportion^3 | -12.1449   | 8.74671  | -1.38851   | 0.166841  |
|      |      |          |     | Investment Proportion^2 | 2.48931    | 13.5068  | 0.1843     | 0.854003  |
|      |      |          |     | Investment Proportion   | 59.6429    | 5.94562  | 10.0314    | < 0.0001  |
|      |      |          |     | Intercept               | 1.54269    | 0.693976 | 2.22297    | 0.0275683 |

|      |      |          |     |                         |          |          |           |           |
|------|------|----------|-----|-------------------------|----------|----------|-----------|-----------|
| 0.63 | 0.6  | < 0.0001 | 37  | Investment Proportion^3 | -10.3921 | 2.47186  | -4.20416  | 0.0001592 |
|      |      |          |     | Investment Proportion^2 | 18.8448  | 3.59353  | 5.24408   | < 0.0001  |
|      |      |          |     | Investment Proportion   | -10.4417 | 1.4562   | -7.17053  | < 0.0001  |
|      |      |          |     | Intercept               | 1.7042   | 0.136134 | 12.5186   | < 0.0001  |
| 0.63 | 0.65 | < 0.0001 | 57  | Investment Proportion^3 | 8.16779  | 5.32637  | 1.53346   | 0.130694  |
|      |      |          |     | Investment Proportion^2 | -6.11593 | 7.56222  | -0.808748 | 0.422023  |
|      |      |          |     | Investment Proportion   | -3.74211 | 3.08569  | -1.21273  | 0.230235  |
|      |      |          |     | Intercept               | 2.48025  | 0.343019 | 7.23065   | < 0.0001  |
| 0.63 | 0.7  | < 0.0001 | 100 | Investment Proportion^3 | 64.3939  | 9.19429  | 7.00369   | < 0.0001  |
|      |      |          |     | Investment Proportion^2 | -90.9381 | 12.2691  | -7.41199  | < 0.0001  |
|      |      |          |     | Investment Proportion   | 28.8492  | 4.43893  | 6.49914   | < 0.0001  |
|      |      |          |     | Intercept               | 1.06391  | 0.469255 | 2.26722   | 0.025529  |
| 0.63 | 0.75 | < 0.0001 | 162 | Investment Proportion^3 | 96.2023  | 10.463   | 9.19451   | < 0.0001  |
|      |      |          |     | Investment Proportion^2 | -163.82  | 14.4291  | -11.3534  | < 0.0001  |
|      |      |          |     | Investment Proportion   | 70.9622  | 5.50845  | 12.8824   | < 0.0001  |
|      |      |          |     | Intercept               | -1.82903 | 0.595804 | -3.06985  | 0.0025118 |
| 0.63 | 0.8  | < 0.0001 | 192 | Investment Proportion^3 | 12.0165  | 20.2971  | 0.592028  | 0.554529  |
|      |      |          |     | Investment Proportion^2 | -62.7837 | 28.3734  | -2.21277  | 0.0280921 |

|      |      |          |     |                         |          |          |           |           |
|------|------|----------|-----|-------------------------|----------|----------|-----------|-----------|
|      |      |          |     | Investment Proportion   | 48.8508  | 11.7143  | 4.17019   | < 0.0001  |
|      |      |          |     | Intercept               | 0.372376 | 1.30864  | 0.284551  | 0.776295  |
| 0.63 | 0.85 | < 0.0001 | 208 | Investment Proportion^3 | -21.9214 | 23.8804  | -0.917966 | 0.3597    |
|      |      |          |     | Investment Proportion^2 | -21.2829 | 36.3064  | -0.586202 | 0.558376  |
|      |      |          |     | Investment Proportion   | 49.5441  | 16.2099  | 3.05642   | 0.0025337 |
|      |      |          |     | Intercept               | 0.627137 | 1.99149  | 0.314908  | 0.753147  |
| 0.63 | 0.9  | < 0.0001 | 205 | Investment Proportion^3 | -72.5979 | 22.6278  | -3.20835  | 0.0015493 |
|      |      |          |     | Investment Proportion^2 | 63.4626  | 35.7968  | 1.77286   | 0.0777375 |
|      |      |          |     | Investment Proportion   | 26.293   | 16.4004  | 1.60319   | 0.110431  |
|      |      |          |     | Intercept               | 3.22325  | 2.04658  | 1.57494   | 0.116812  |
| 0.63 | 0.95 | < 0.0001 | 184 | Investment Proportion^3 | -69.2285 | 21.7253  | -3.18653  | 0.0016918 |
|      |      |          |     | Investment Proportion^2 | 76.3453  | 34.495   | 2.21323   | 0.0281114 |
|      |      |          |     | Investment Proportion   | 26.178   | 15.9642  | 1.63979   | 0.102758  |
|      |      |          |     | Intercept               | 4.16025  | 2.05124  | 2.02816   | 0.0439855 |
| 0.62 | 0.65 | < 0.0001 | 51  | Investment Proportion^3 | -5.48187 | 3.42781  | -1.59923  | 0.115946  |
|      |      |          |     | Investment Proportion^2 | 12.7869  | 4.92432  | 2.59669   | 0.0122683 |
|      |      |          |     | Investment Proportion   | -9.36715 | 1.99145  | -4.70367  | < 0.0001  |
|      |      |          |     | Intercept               | 2.10751  | 0.192725 | 10.9353   | < 0.0001  |

|      |      |          |     |                         |           |          |           |           |
|------|------|----------|-----|-------------------------|-----------|----------|-----------|-----------|
| 0.62 | 0.7  | < 0.0001 | 74  | Investment Proportion^3 | 28.0492   | 6.65915  | 4.21213   | < 0.0001  |
|      |      |          |     | Investment Proportion^2 | -35.4757  | 8.96169  | -3.95859  | 0.0001716 |
|      |      |          |     | Investment Proportion   | 7.1622    | 3.35922  | 2.1321    | 0.0363173 |
|      |      |          |     | Intercept               | 2.05619   | 0.359889 | 5.71341   | < 0.0001  |
| 0.62 | 0.75 | < 0.0001 | 135 | Investment Proportion^3 | 80.31     | 9.79299  | 8.20076   | < 0.0001  |
|      |      |          |     | Investment Proportion^2 | -122.275  | 13.1001  | -9.33386  | < 0.0001  |
|      |      |          |     | Investment Proportion   | 45.0183   | 4.67229  | 9.63516   | < 0.0001  |
|      |      |          |     | Intercept               | 0.0465566 | 0.470221 | 0.0990102 | 0.921277  |
| 0.62 | 0.8  | < 0.0001 | 166 | Investment Proportion^3 | 91.5804   | 12.2474  | 7.47755   | < 0.0001  |
|      |      |          |     | Investment Proportion^2 | -165.652  | 16.8658  | -9.82177  | < 0.0001  |
|      |      |          |     | Investment Proportion   | 76.0507   | 6.65498  | 11.4276   | < 0.0001  |
|      |      |          |     | Intercept               | -1.85892  | 0.751362 | -2.47407  | 0.0143639 |
| 0.62 | 0.85 | < 0.0001 | 198 | Investment Proportion^3 | 14.7097   | 24.7313  | 0.594779  | 0.55267   |
|      |      |          |     | Investment Proportion^2 | -74.0436  | 35.0358  | -2.11337  | 0.0358217 |
|      |      |          |     | Investment Proportion   | 59.5159   | 14.7594  | 4.0324    | < 0.0001  |
|      |      |          |     | Intercept               | -0.359877 | 1.7493   | -0.205726 | 0.837216  |
| 0.62 | 0.9  | < 0.0001 | 234 | Investment Proportion^3 | -13.6115  | 24.4482  | -0.556748 | 0.578231  |
|      |      |          |     | Investment Proportion^2 | -28.1049  | 37.0066  | -0.759456 | 0.448344  |

|      |      |          |     |                         |            |          |            |           |
|------|------|----------|-----|-------------------------|------------|----------|------------|-----------|
|      |      |          |     | Investment Proportion   | 54.0962    | 16.27    | 3.32491    | 0.0010267 |
|      |      |          |     | intercept               | 0.54279    | 1.90204  | 0.285372   | 0.775612  |
| 0.62 | 0.95 | < 0.0001 | 219 | Investment Proportion^3 | -89.1099   | 20.3172  | -4.38593   | < 0.0001  |
|      |      |          |     | Investment Proportion^2 | 99.719     | 33.1843  | 3.005      | 0.0029653 |
|      |      |          |     | Investment Proportion   | 10.5956    | 15.8735  | 0.667505   | 0.505152  |
|      |      |          |     | Intercept               | 5.23721    | 2.10751  | 2.48502    | 0.0137031 |
| 0.61 | 0.65 | < 0.0001 | 38  | Investment Proportion^3 | -9.50748   | 2.28321  | -4.16409   | 0.000173  |
|      |      |          |     | Investment Proportion^2 | 17.4423    | 3.32776  | 5.24147    | < 0.0001  |
|      |      |          |     | Investment Proportion   | -9.82288   | 1.32724  | -7.40101   | < 0.0001  |
|      |      |          |     | Intercept               | 1.64203    | 0.111421 | 14.7371    | < 0.0001  |
| 0.61 | 0.7  | < 0.0001 | 58  | Investment Proportion^3 | -0.0624039 | 4.84745  | -0.0128736 | 0.989773  |
|      |      |          |     | Investment Proportion^2 | 5.60556    | 6.71411  | 0.834893   | 0.407204  |
|      |      |          |     | Investment Proportion   | -7.52904   | 2.62856  | -2.86432   | 0.0058096 |
|      |      |          |     | Intercept               | 2.35799    | 0.27006  | 8.73133    | < 0.0001  |
| 0.61 | 0.75 | < 0.0001 | 95  | Investment Proportion^3 | 44.6274    | 8.42089  | 5.29961    | < 0.0001  |
|      |      |          |     | Investment Proportion^2 | -59.3627   | 11.0467  | -5.37379   | < 0.0001  |
|      |      |          |     | Investment Proportion   | 15.6443    | 3.88061  | 4.03141    | 0.0001119 |
|      |      |          |     | Intercept               | 1.78876    | 0.392645 | 4.55566    | < 0.0001  |

|      |      |          |     |                         |           |         |          |           |
|------|------|----------|-----|-------------------------|-----------|---------|----------|-----------|
| 0.61 | 0.8  | < 0.0001 | 140 | Investment Proportion^3 | 98.6456   | 11.6111 | 8.49584  | < 0.0001  |
|      |      |          |     | Investment Proportion^2 | -155.744  | 15.9317 | -9.7757  | < 0.0001  |
|      |      |          |     | Investment Proportion   | 61.1467   | 5.98535 | 10.2161  | < 0.0001  |
|      |      |          |     | Intercept               | -0.894486 | 0.64531 | -1.38613 | 0.16791   |
| 0.61 | 0.85 | < 0.0001 | 153 | Investment Proportion^3 | 64.1011   | 16.5139 | 3.88165  | 0.0001539 |
|      |      |          |     | Investment Proportion^2 | -135.3    | 23.1824 | -5.83633 | < 0.0001  |
|      |      |          |     | Investment Proportion   | 70.4737   | 9.44919 | 7.45818  | < 0.0001  |
|      |      |          |     | Intercept               | -1.23132  | 1.10019 | -1.11919 | 0.264815  |
| 0.61 | 0.9  | < 0.0001 | 218 | Investment Proportion^3 | 10.243    | 26.5398 | 0.385949 | 0.699911  |
|      |      |          |     | Investment Proportion^2 | -59.7141  | 38.1776 | -1.56411 | 0.119242  |
|      |      |          |     | Investment Proportion   | 54.4911   | 16.2186 | 3.3598   | 0.0009207 |
|      |      |          |     | Intercept               | 0.492452  | 1.88696 | 0.260976 | 0.794357  |
| 0.61 | 0.95 | < 0.0001 | 216 | Investment Proportion^3 | -37.5687  | 28.3518 | -1.32509 | 0.186541  |
|      |      |          |     | Investment Proportion^2 | 16.7394   | 44.8804 | 0.372977 | 0.709531  |
|      |      |          |     | Investment Proportion   | 36.1754   | 20.8145 | 1.73799  | 0.0836381 |
|      |      |          |     | Intercept               | 2.53998   | 2.66435 | 0.95332  | 0.341494  |
| 0.6  | 0.7  | < 0.0001 | 52  | Investment Proportion^3 | -10.8201  | 3.03159 | -3.56911 | 0.0007806 |
|      |      |          |     | Investment Proportion^2 | 20.3296   | 4.34006 | 4.68418  | < 0.0001  |

|     |      |          |     |                         |          |          |           |           |
|-----|------|----------|-----|-------------------------|----------|----------|-----------|-----------|
|     |      |          |     | Investment Proportion   | -11.8206 | 1.74185  | -6.78622  | < 0.0001  |
|     |      |          |     | Intercept               | 2.06573  | 0.164144 | 12.5849   | < 0.0001  |
| 0.6 | 0.75 | < 0.0001 | 64  | Investment Proportion^3 | 17.8038  | 5.22443  | 3.4078    | 0.0011371 |
|     |      |          |     | Investment Proportion^2 | -20.8719 | 7.08764  | -2.94483  | 0.0045002 |
|     |      |          |     | Investment Proportion   | 2.21293  | 2.68593  | 0.823896  | 0.413058  |
|     |      |          |     | Intercept               | 2.08833  | 0.271539 | 7.69072   | < 0.0001  |
| 0.6 | 0.8  | < 0.0001 | 103 | Investment Proportion^3 | 62.9076  | 10.6996  | 5.87944   | < 0.0001  |
|     |      |          |     | Investment Proportion^2 | -86.8656 | 14.4557  | -6.00911  | < 0.0001  |
|     |      |          |     | Investment Proportion   | 25.782   | 5.35686  | 4.8129    | < 0.0001  |
|     |      |          |     | Intercept               | 1.64579  | 0.59432  | 2.7692    | 0.0066661 |
| 0.6 | 0.85 | < 0.0001 | 150 | Investment Proportion^3 | 97.1895  | 13.3154  | 7.29905   | < 0.0001  |
|     |      |          |     | Investment Proportion^2 | -162.944 | 18.2892  | -8.9093   | < 0.0001  |
|     |      |          |     | Investment Proportion   | 68.8516  | 6.90943  | 9.96488   | < 0.0001  |
|     |      |          |     | intercept               | -1.29988 | 0.759255 | -1.71204  | 0.0889552 |
| 0.6 | 0.9  | < 0.0001 | 178 | Investment Proportion^3 | 59.0775  | 19.0543  | 3.10049   | 0.0022466 |
|     |      |          |     | Investment Proportion^2 | -130.184 | 26.9402  | -4.83234  | < 0.0001  |
|     |      |          |     | Investment Proportion   | 71.8644  | 11.2793  | 6.37134   | < 0.0001  |
|     |      |          |     | Intercept               | -1.30592 | 1.32648  | -0.984495 | 0.326208  |

|      |      |          |     |                         |          |          |           |           |
|------|------|----------|-----|-------------------------|----------|----------|-----------|-----------|
| 0.6  | 0.95 | < 0.0001 | 233 | Investment Proportion^3 | 26.2969  | 32.6018  | 0.806609  | 0.420714  |
|      |      |          |     | Investment Proportion^2 | -70.3418 | 48.8934  | -1.43868  | 0.151584  |
|      |      |          |     | Investment Proportion   | 55.4539  | 21.7241  | 2.55264   | 0.0113301 |
|      |      |          |     | Intercept               | 1.03727  | 2.68576  | 0.38621   | 0.699693  |
| 0.59 | 0.7  | < 0.0001 | 42  | Investment Proportion^3 | -7.99933 | 1.63719  | -4.886    | < 0.0001  |
|      |      |          |     | Investment Proportion^2 | 14.7058  | 2.34987  | 6.25813   | < 0.0001  |
|      |      |          |     | Investment Proportion   | -8.31376 | 0.913407 | -9.10193  | < 0.0001  |
|      |      |          |     | Intercept               | 1.40083  | 0.071193 | 19.6765   | < 0.0001  |
| 0.59 | 0.75 | < 0.0001 | 56  | Investment Proportion^3 | -2.85116 | 4.59566  | -0.620402 | 0.53751   |
|      |      |          |     | Investment Proportion^2 | 9.55905  | 6.43353  | 1.48582   | 0.142936  |
|      |      |          |     | Investment Proportion   | -8.78697 | 2.53366  | -3.46809  | 0.0010149 |
|      |      |          |     | Intercept               | 2.30808  | 0.249983 | 9.23293   | < 0.0001  |
| 0.59 | 0.8  | < 0.0001 | 68  | Investment Proportion^3 | 23.1814  | 8.28633  | 2.79755   | 0.0066916 |
|      |      |          |     | Investment Proportion^2 | -26.9945 | 11.2916  | -2.39067  | 0.0195923 |
|      |      |          |     | Investment Proportion   | 2.88453  | 4.35293  | 0.662664  | 0.509786  |
|      |      |          |     | Intercept               | 2.59076  | 0.490047 | 5.28676   | < 0.0001  |
| 0.59 | 0.85 | < 0.0001 | 119 | Investment Proportion^3 | 86.8066  | 12.2234  | 7.10166   | < 0.0001  |
|      |      |          |     | Investment Proportion^2 | -125.087 | 16.3862  | -7.63368  | < 0.0001  |

|      |      |          |     |                         |           |          |           |           |
|------|------|----------|-----|-------------------------|-----------|----------|-----------|-----------|
|      |      |          |     | Investment Proportion   | 41.8953   | 5.91531  | 7.08252   | < 0.0001  |
|      |      |          |     | Intercept               | 0.681074  | 0.628433 | 1.08376   | 0.28066   |
| 0.59 | 0.9  | < 0.0001 | 169 | Investment Proportion^3 | 103.127   | 10.922   | 9.44211   | < 0.0001  |
|      |      |          |     | Investment Proportion^2 | -180.75   | 14.8812  | -12.1462  | < 0.0001  |
|      |      |          |     | Investment Proportion   | 80.742    | 5.55097  | 14.5456   | < 0.0001  |
|      |      |          |     | Intercept               | -2.25735  | 0.597851 | -3.77577  | 0.0002206 |
| 0.59 | 0.95 | < 0.0001 | 163 | Investment Proportion^3 | 55.429    | 24.6264  | 2.2508    | 0.0257352 |
|      |      |          |     | Investment Proportion^2 | -117.092  | 34.7844  | -3.36621  | 0.0009505 |
|      |      |          |     | Investment Proportion   | 65.7472   | 14.5208  | 4.52781   | < 0.0001  |
|      |      |          |     | Intercept               | -0.221955 | 1.70363  | -0.130283 | 0.896503  |
| 0.58 | 0.75 | < 0.0001 | 40  | Investment Proportion^3 | -13.4493  | 2.86447  | -4.69521  | < 0.0001  |
|      |      |          |     | Investment Proportion^2 | 23.7181   | 4.114    | 5.76521   | < 0.0001  |
|      |      |          |     | Investment Proportion   | -12.5757  | 1.6369   | -7.68265  | < 0.0001  |
|      |      |          |     | Intercept               | 1.89792   | 0.147317 | 12.8832   | < 0.0001  |
| 0.58 | 0.8  | < 0.0001 | 58  | Investment Proportion^3 | 4.35367   | 5.59084  | 0.778715  | 0.439313  |
|      |      |          |     | Investment Proportion^2 | -0.871637 | 7.71847  | -0.112929 | 0.910477  |
|      |      |          |     | Investment Proportion   | -5.18626  | 3.02379  | -1.71515  | 0.091656  |
|      |      |          |     | Intercept               | 2.29879   | 0.317344 | 7.24384   | < 0.0001  |

|      |      |          |     |                         |           |          |           |           |
|------|------|----------|-----|-------------------------|-----------|----------|-----------|-----------|
| 0.58 | 0.85 | < 0.0001 | 76  | Investment Proportion^3 | 43.3814   | 9.22362  | 4.70329   | < 0.0001  |
|      |      |          |     | Investment Proportion^2 | -57.448   | 12.2689  | -4.68242  | < 0.0001  |
|      |      |          |     | Investment Proportion   | 14.6926   | 4.53171  | 3.24218   | 0.0017626 |
|      |      |          |     | Intercept               | 1.98543   | 0.506694 | 3.9184    | 0.0001934 |
| 0.58 | 0.9  | < 0.0001 | 165 | Investment Proportion^3 | 99.9037   | 11.765   | 8.4916    | < 0.0001  |
|      |      |          |     | Investment Proportion^2 | -150.303  | 15.781   | -9.52429  | < 0.0001  |
|      |      |          |     | Investment Proportion   | 54.741    | 5.72329  | 9.5646    | < 0.0001  |
|      |      |          |     | Intercept               | -0.165699 | 0.605143 | -0.273817 | 0.784567  |
| 0.58 | 0.95 | < 0.0001 | 157 | Investment Proportion^3 | 90.4826   | 12.5189  | 7.22766   | < 0.0001  |
|      |      |          |     | Investment Proportion^2 | -168.154  | 17.3166  | -9.71055  | < 0.0001  |
|      |      |          |     | Investment Proportion   | 79.1152   | 6.69053  | 11.8249   | < 0.0001  |
|      |      |          |     | Intercept               | -1.92343  | 0.747149 | -2.57435  | 0.0109669 |

File 8. Near-Optimal Parameter Values and Returns for Strategy C

| $p$  | $r$  | $z^*$       | $w^*$       | $v^*$       | $roiC^*$ |
|------|------|-------------|-------------|-------------|----------|
| 0.52 | 0.95 | <b>0.15</b> | <b>2.00</b> | <b>0.90</b> | 1.81     |
| 0.53 | 0.90 | <b>0.20</b> | <b>2.00</b> | <b>0.90</b> | 1.82     |
| 0.53 | 0.95 | <b>0.10</b> | <b>2.00</b> | <b>0.90</b> | 1.89     |
| 0.54 | 0.90 | <b>0.55</b> | <b>1.80</b> | <b>0.90</b> | 2.01     |
| 0.54 | 0.95 | <b>0.60</b> | <b>2.00</b> | <b>0.90</b> | 2.01     |
| 0.55 | 0.85 | <b>0.30</b> | <b>2.00</b> | <b>0.90</b> | 1.85     |
| 0.55 | 0.90 | <b>0.55</b> | <b>1.80</b> | <b>0.90</b> | 2.01     |
| 0.55 | 0.90 | <b>0.55</b> | <b>2.00</b> | <b>0.90</b> | 2.01     |
| 0.55 | 0.95 | <b>0.15</b> | <b>2.00</b> | <b>0.20</b> | 2.61     |
| 0.56 | 0.80 | <b>0.30</b> | <b>2.00</b> | <b>0.90</b> | 1.85     |
| 0.56 | 0.85 | <b>0.25</b> | <b>2.00</b> | <b>0.90</b> | 1.95     |
| 0.56 | 0.90 | <b>0.15</b> | <b>1.80</b> | <b>0.60</b> | 2.32     |
| 0.56 | 0.95 | <b>0.15</b> | <b>2.00</b> | <b>0.20</b> | 3.51     |
| 0.57 | 0.80 | <b>0.10</b> | <b>2.00</b> | <b>0.90</b> | 1.90     |
| 0.57 | 0.85 | <b>0.15</b> | <b>2.00</b> | <b>0.20</b> | 2.11     |
| 0.57 | 0.90 | <b>0.20</b> | <b>1.80</b> | <b>0.10</b> | 3.02     |
| 0.57 | 0.95 | <b>0.15</b> | <b>2.00</b> | <b>0.30</b> | 4.70     |
| 0.58 | 0.75 | <b>0.25</b> | <b>2.00</b> | <b>0.90</b> | 1.85     |
| 0.58 | 0.80 | <b>0.15</b> | <b>2.00</b> | <b>0.90</b> | 1.93     |
| 0.58 | 0.85 | <b>0.15</b> | <b>2.00</b> | <b>0.40</b> | 2.62     |
| 0.58 | 0.90 | <b>0.20</b> | <b>2.00</b> | <b>0.10</b> | 4.25     |
| 0.58 | 0.95 | <b>0.20</b> | <b>2.00</b> | <b>0.10</b> | 6.57     |
| 0.59 | 0.70 | <b>0.40</b> | <b>1.80</b> | <b>0.90</b> | 1.69     |
| 0.59 | 0.75 | <b>0.65</b> | <b>2.00</b> | <b>0.90</b> | 1.99     |
| 0.59 | 0.80 | <b>0.10</b> | <b>2.00</b> | <b>0.30</b> | 2.31     |
| 0.59 | 0.85 | <b>0.15</b> | <b>2.00</b> | <b>0.20</b> | 3.82     |
| 0.59 | 0.90 | <b>0.15</b> | <b>2.00</b> | <b>0.10</b> | 5.58     |

| $p$  | $r$  | $z^*$       | $w^*$       | $v^*$       | $roiC^*$ |
|------|------|-------------|-------------|-------------|----------|
| 0.61 | 0.85 | <b>0.25</b> | <b>2.00</b> | <b>0.10</b> | 6.69     |
| 0.61 | 0.90 | <b>0.30</b> | <b>2.00</b> | <b>0.10</b> | 9.74     |
| 0.62 | 0.65 | <b>0.25</b> | <b>2.00</b> | <b>0.90</b> | 1.87     |
| 0.62 | 0.70 | <b>0.15</b> | <b>2.00</b> | <b>0.50</b> | 2.21     |
| 0.62 | 0.75 | <b>0.10</b> | <b>2.00</b> | <b>0.10</b> | 3.61     |
| 0.62 | 0.80 | <b>0.20</b> | <b>2.00</b> | <b>0.10</b> | 5.47     |
| 0.62 | 0.85 | <b>0.25</b> | <b>2.00</b> | <b>0.10</b> | 8.50     |
| 0.63 | 0.60 | <b>0.80</b> | <b>2.00</b> | <b>0.90</b> | 1.82     |
| 0.63 | 0.65 | <b>0.75</b> | <b>2.00</b> | <b>0.90</b> | 1.99     |
| 0.63 | 0.70 | <b>0.15</b> | <b>1.80</b> | <b>0.10</b> | 2.89     |
| 0.63 | 0.75 | <b>0.20</b> | <b>2.00</b> | <b>0.10</b> | 4.89     |
| 0.63 | 0.80 | <b>0.25</b> | <b>2.00</b> | <b>0.10</b> | 7.78     |
| 0.64 | 0.60 | <b>0.10</b> | <b>2.00</b> | <b>0.90</b> | 1.87     |
| 0.64 | 0.65 | <b>0.15</b> | <b>2.00</b> | <b>0.40</b> | 2.42     |
| 0.64 | 0.70 | <b>0.25</b> | <b>1.80</b> | <b>0.10</b> | 4.14     |
| 0.64 | 0.75 | <b>0.25</b> | <b>2.00</b> | <b>0.10</b> | 6.63     |
| 0.64 | 0.80 | <b>0.25</b> | <b>2.00</b> | <b>0.10</b> | 9.40     |
| 0.65 | 0.55 | <b>0.25</b> | <b>2.00</b> | <b>0.90</b> | 1.84     |
| 0.65 | 0.60 | <b>0.55</b> | <b>2.00</b> | <b>0.90</b> | 2.12     |
| 0.65 | 0.65 | <b>0.15</b> | <b>2.00</b> | <b>0.20</b> | 3.43     |
| 0.65 | 0.70 | <b>0.20</b> | <b>2.00</b> | <b>0.20</b> | 5.27     |
| 0.65 | 0.75 | <b>0.25</b> | <b>2.00</b> | <b>0.10</b> | 8.70     |
| 0.66 | 0.55 | <b>0.85</b> | <b>1.80</b> | <b>0.90</b> | 1.94     |
| 0.66 | 0.60 | <b>0.20</b> | <b>1.80</b> | <b>0.10</b> | 2.48     |
| 0.66 | 0.65 | <b>0.25</b> | <b>1.80</b> | <b>0.10</b> | 4.51     |
| 0.66 | 0.70 | <b>0.25</b> | <b>2.00</b> | <b>0.10</b> | 7.66     |
| 0.67 | 0.50 | <b>0.30</b> | <b>2.00</b> | <b>0.90</b> | 1.81     |

|      |      |             |             |             |      |
|------|------|-------------|-------------|-------------|------|
| 0.59 | 0.95 | <b>0.20</b> | <b>2.00</b> | <b>0.10</b> | 8.12 |
| 0.60 | 0.70 | <b>0.65</b> | <b>1.80</b> | <b>0.90</b> | 1.91 |
| 0.60 | 0.70 | <b>0.65</b> | <b>2.00</b> | <b>0.90</b> | 1.91 |
| 0.60 | 0.75 | <b>0.10</b> | <b>2.00</b> | <b>0.30</b> | 2.02 |
| 0.60 | 0.80 | <b>0.15</b> | <b>2.00</b> | <b>0.20</b> | 3.27 |
| 0.60 | 0.85 | <b>0.20</b> | <b>2.00</b> | <b>0.10</b> | 4.78 |
| 0.60 | 0.90 | <b>0.20</b> | <b>2.00</b> | <b>0.10</b> | 7.47 |
| 0.61 | 0.65 | <b>0.65</b> | <b>1.60</b> | <b>0.90</b> | 1.82 |
| 0.61 | 0.65 | <b>0.65</b> | <b>1.80</b> | <b>0.90</b> | 1.82 |
| 0.61 | 0.65 | <b>0.65</b> | <b>2.00</b> | <b>0.90</b> | 1.82 |
| 0.61 | 0.70 | <b>0.70</b> | <b>1.60</b> | <b>0.90</b> | 1.97 |
| 0.61 | 0.75 | <b>0.15</b> | <b>1.80</b> | <b>0.10</b> | 2.73 |
| 0.61 | 0.80 | <b>0.15</b> | <b>2.00</b> | <b>0.10</b> | 4.45 |

|      |      |             |             |             |      |
|------|------|-------------|-------------|-------------|------|
| 0.67 | 0.55 | <b>0.90</b> | <b>2.00</b> | <b>0.90</b> | 2.01 |
| 0.67 | 0.60 | <b>0.15</b> | <b>2.00</b> | <b>0.10</b> | 3.51 |
| 0.67 | 0.65 | <b>0.30</b> | <b>2.00</b> | <b>0.10</b> | 5.93 |
| 0.67 | 0.70 | <b>0.25</b> | <b>1.80</b> | <b>0.10</b> | 9.43 |
| 0.68 | 0.50 | <b>0.95</b> | <b>2.00</b> | <b>0.90</b> | 1.91 |
| 0.68 | 0.55 | <b>0.15</b> | <b>2.00</b> | <b>0.20</b> | 2.55 |
| 0.68 | 0.60 | <b>0.25</b> | <b>2.00</b> | <b>0.10</b> | 4.61 |
| 0.68 | 0.65 | <b>0.25</b> | <b>2.00</b> | <b>0.10</b> | 7.61 |
| 0.69 | 0.50 | <b>0.45</b> | <b>2.00</b> | <b>0.90</b> | 2.03 |
| 0.69 | 0.55 | <b>0.20</b> | <b>2.00</b> | <b>0.10</b> | 3.62 |
| 0.69 | 0.60 | <b>0.30</b> | <b>2.00</b> | <b>0.10</b> | 6.01 |
| 0.70 | 0.50 | <b>0.20</b> | <b>2.00</b> | <b>0.30</b> | 2.54 |
| 0.70 | 0.55 | <b>0.20</b> | <b>2.00</b> | <b>0.10</b> | 4.62 |
| 0.70 | 0.60 | <b>0.30</b> | <b>2.00</b> | <b>0.10</b> | 8.12 |

### File 9. Analysis of Skewness

Figure 1 exhibits the change in the skewness of the *roi* for the different strategies in relation to prediction accuracy  $p$  on the x-axis. To enable a robust analysis, the medians of the skewness values are plotted. Figure 1 suggests that *roiA Skewness* for Strategy A is considerably higher than it is for other strategies; that is to say, *roiA* for Strategy A is always much more skewed to the right (left-leaning probability density function, higher variance). Figure 1 also suggests that the skewness of the *roi* for all strategies decreases gradually for higher values of prediction accuracy  $p$ .

Figure 2 exhibits the change in the skewness of the *roi* for the different strategies in relation to payout percentage  $r$  on the x-axis. The medians of the skewness values are plotted to ensure robustness. Figure 2 indicates that *roiA Skewness* for Strategy A is significantly higher than its counterparts for other strategies. Thus, *roiA Skewness* for Strategy A is much more skewed to the right (probability density function leaning to the left). Furthermore, *roiA Skewness* even increases with higher values of  $r$ . Figure 2 also indicates that *roiB Skewness* for Strategy B is neither the lowest nor is it the one that decreases most with higher values of the payout percentage  $r$ . Skewness values for Strategies C and D exhibit very little change under varying values of payout percentage  $r$ .

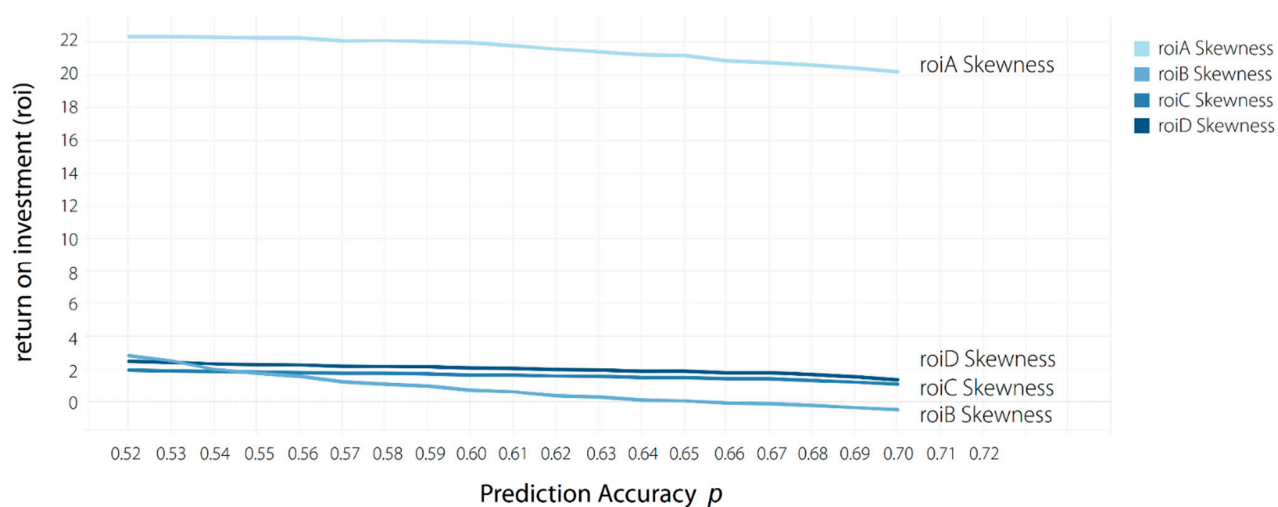

**Figure S1.** Change in (median) roi Skewness of the strategies in relation to prediction accuracy  $p$  on the x-axis.

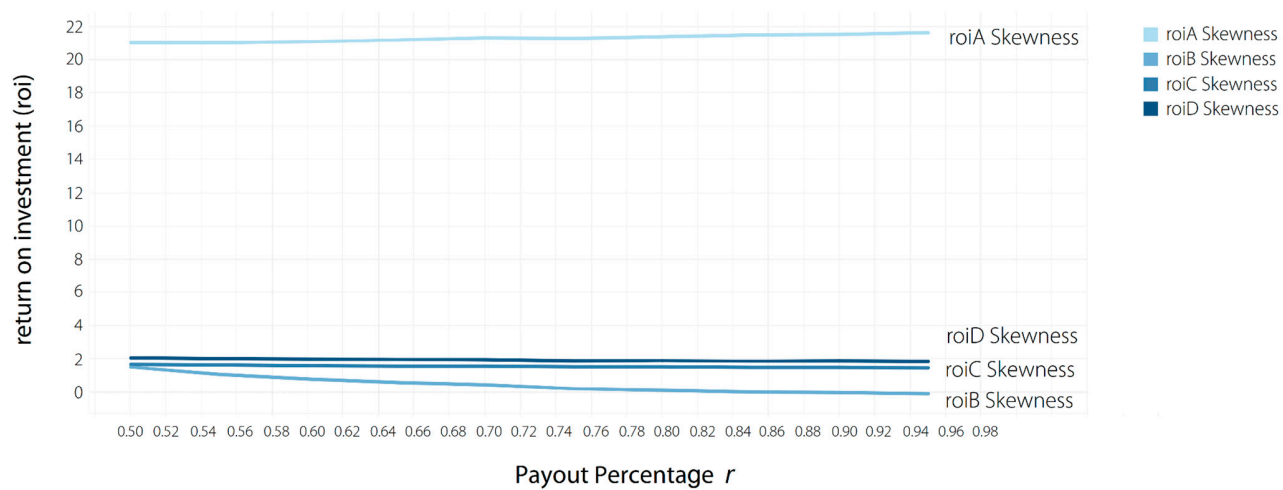

**Figure S2.** Change in (median) roi Skewness of the strategies in relation to payout percentage  $r$  on the x-axis.
